# Supplementary material for: Metallosalen-based microporous organic polymers: synthesis and carbon dioxide uptake
Source: Royal Society of Chemistry journal article supplement (doi:10.1039/c4ra04589k), 2014-01-01
Supplement: c4ra04589k1.pdf [file c4ra04589k1.pdf]

## ***Electronic Supplementary Information (ESI)***

### **Metallosalen-based microporous organic polymers: synthesis and carbon dioxide uptake**

He Li<sup>a</sup>, Zhongping Li<sup>a</sup>, Yuwei Zhang<sup>a</sup>, Xiaolong Luo<sup>c</sup>, Hong Xia<sup>b</sup>, Xiaoming Liu<sup>a\*</sup> and Ying Mu<sup>a</sup>

<sup>a</sup> *State Key Laboratory for Supramolecular Structure and Materials, School of Chemistry, Jilin University, Changchun 130012, P. R.China*

<sup>b</sup> *State Key Laboratory on Integrated Optoelectronics, College of Electronic Science and Technology, Jilin University, Changchun 130012, P. R.China*

<sup>c</sup> *State Key Laboratory of Inorganic Synthesis and Preparative Chemistry, College of Chemistry, Jilin University, Changchun, 130012, P.R.China.*

Email: xm\_liu@jlu.edu.cn

## Section A. Synthesis of Salen Monomers

### Synthesis of Salen ligand.

A solution of ethylenediamine (0.5 mL, 7.5 mmol) in ethanol (10 mL) was added to a solution of 5-bromosalicylaldehyde (3.0 g, 15 mmol) in ethanol (30 mL) at room temperature. The mixture was refluxed and stirred for 6 h. After the mixture was cooled to room temperature, the precipitate was filtered off and washed with ethanol (50 mL). After drying in vacuum, *N,N'*-bis(5-bromosalicylidene)-1,2-ethylenediamine (Salen ligand) was obtained as a light yellow powder (3.1 g, 7.27 mmol, 96.8%). <sup>1</sup>H NMR (400 MHz, CDCl<sub>3</sub>) δ: 3.96 (s, 4H, CH<sub>2</sub>), 6.85 (d, 2H, *J* = 8.76 Hz, *Ph*-H), 7.34 (d, 2H, *J* = 1.80 Hz, *Ph*-H), 7.38 (dd, 2H, *J* = 1.80, 8.80 Hz, *Ph*-H), 8.29 (s, 2H, CH=N), 13.15 (s, 2H, OH) ppm. Anal. Calcd for C<sub>16</sub>H<sub>14</sub>Br<sub>2</sub>N<sub>2</sub>O<sub>2</sub> (426.1): C, 45.10; H, 3.31; N, 6.57; Found: C, 45.01; H, 3.38; N, 6.64.

### Synthesis of Salen-Zn.

A solution of Zn(OAc)<sub>2</sub>·2H<sub>2</sub>O (0.21 g, 0.94 mmol) in methanol (10 mL) was added to a solution of Salen (0.40 g, 0.94 mmol) in dichloromethane (30 mL) at room temperature. Then the mixture was refluxed and stirred for 4h. After the mixture was cooled to room temperature, the precipitate was filtered off and washed with methanol (40 mL). After drying in vacuum, Salen-Zn was obtained as a yellow powder (0.37 g, 0.76 mmol, 81.4%). <sup>1</sup>H NMR (400 MHz, DMSO) δ: 3.72 (s, 4H, CH<sub>2</sub>), 6.58 (d, 2H, *J* = 8.76 Hz, *Ph*-H), 7.21 (dd, 2H, *J* = 2.93, 8.94 Hz, *Ph*-H), 7.34 (d, 2H, *J* = 2.96 Hz, *Ph*-H), 8.42 (s, 2H, CH=N) ppm. Anal. Calcd for C<sub>16</sub>H<sub>12</sub>Br<sub>2</sub>N<sub>2</sub>O<sub>2</sub>Zn (489.5): C, 39.26; H, 2.47; N, 5.72; Found: C, 39.14; H, 2.53; N, 5.85. IR (KBr): ν 412, 464, 498, 541, 635, 687, 787, 819, 872, 972, 1028, 1089, 1135, 1176, 1300, 1371, 1459, 1520, 1587, 1626, 2899 cm<sup>-1</sup>.

### Synthesis of Salen-Ni.

A solution of Ni(OAc)<sub>2</sub>·4H<sub>2</sub>O (0.23 g, 0.94 mmol) in methanol (15 mL) was added to a solution of Salen (0.40 g, 0.94 mmol) in dichloromethane (30 mL) at room temperature. Then the mixture was refluxed and stirred for 4h. After the mixture was cooled to room temperature, the precipitate was filtered off and washed with methanol (40 mL). After drying in vacuum, Salen-Ni was obtained as a brown powder (0.39 g, 0.82 mmol, 87.3%). <sup>1</sup>H NMR (400 MHz, DMSO) δ: 3.43 (s, 4H, CH<sub>2</sub>), 6.67 (d, 2H, *J* = 9.04 Hz, *Ph*-H), 7.26 (dd, 2H, *J* = 2.93, 8.94 Hz, *Ph*-H), 7.34 (d, 2H, *J* = 2.96 Hz, *Ph*-H), 8.42 (s, 2H, CH=N) ppm. Anal. Calcd for C<sub>16</sub>H<sub>12</sub>Br<sub>2</sub>N<sub>2</sub>O<sub>2</sub>Ni (482.8): C, 39.81; H, 2.51; N, 5.20; Found: C, 39.05; H, 2.60; N, 5.31. IR (KBr): ν 414, 464, 499, 618, 653, 698, 752, 822, 867, 950, 1067, 1092, 1134, 1181, 1241, 1305, 1372, 1422, 1455, 1525, 1625, 2910 cm<sup>-1</sup>.

### Synthesis of Salen-Pt.

Sodium acetate (0.041 g, 0.5 mmol) was suspended in a solution of Salen (0.10 g, 0.25 mmol) in DMF (8 mL). K<sub>2</sub>PtCl<sub>4</sub> (0.10 g, 0.25 mmol) dissolved in DMSO (2 mL) was added dropwise to the suspension at 70°C and the resulting mixture was stirred

for 15 h at the same temperature. After the mixture was cooled to room temperature, diethyl ether (25 mL) was added to the mixture to afford an orange precipitate. The solid product was filtered and washed with Et<sub>2</sub>O (5 × 5 mL). After drying in vacuum, Salen-Pt was obtained as an orange powder (0.13 g, 0.21 mmol, 84.4%). <sup>1</sup>H NMR (400 MHz, DMSO) δ: 3.83 (s, 4H, CH<sub>2</sub>), 6.88 (d, 2H, *J* = 9.08 Hz, *Ph*-H), 7.53 (dd, 2H, *J* = 2.68, 9.10 Hz, *Ph*-H), 7.72 (d, 2H, *J* = 2.68 Hz, *Ph*-H), 8.57 (s, 2H, CH=N) ppm. Anal. Calcd for C<sub>16</sub>H<sub>12</sub>Br<sub>2</sub>N<sub>2</sub>O<sub>2</sub>Pt(619.2): C, 31.04; H, 1.95; N, 4.52; Found: C, 31.11; H, 2.13; N, 4.35. IR (KBr): ν 475, 556, 620, 669, 701, 815, 928, 1082, 1146, 1170, 1292, 1338, 1378, 1416, 1460, 1524, 1592, 1629 cm<sup>-1</sup>.

## Section B. The Stability of MsMOPs

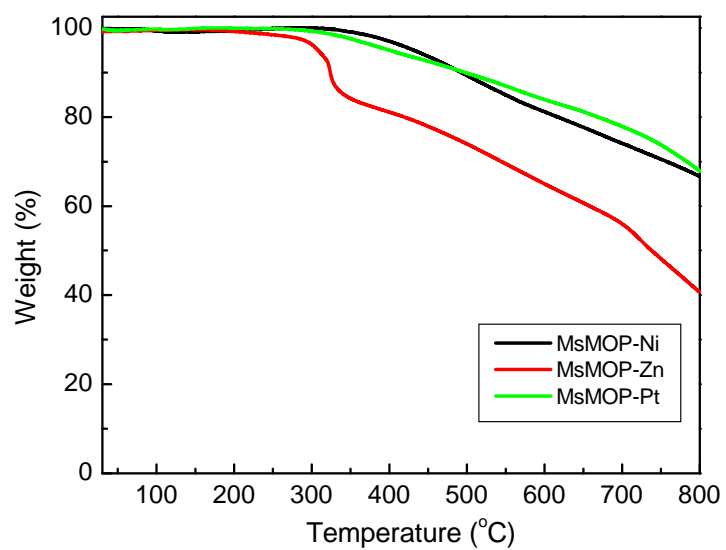

**Fig. S1** TGA curves of MsMOPs under nitrogen.

## Section C. FT-IR Spectra

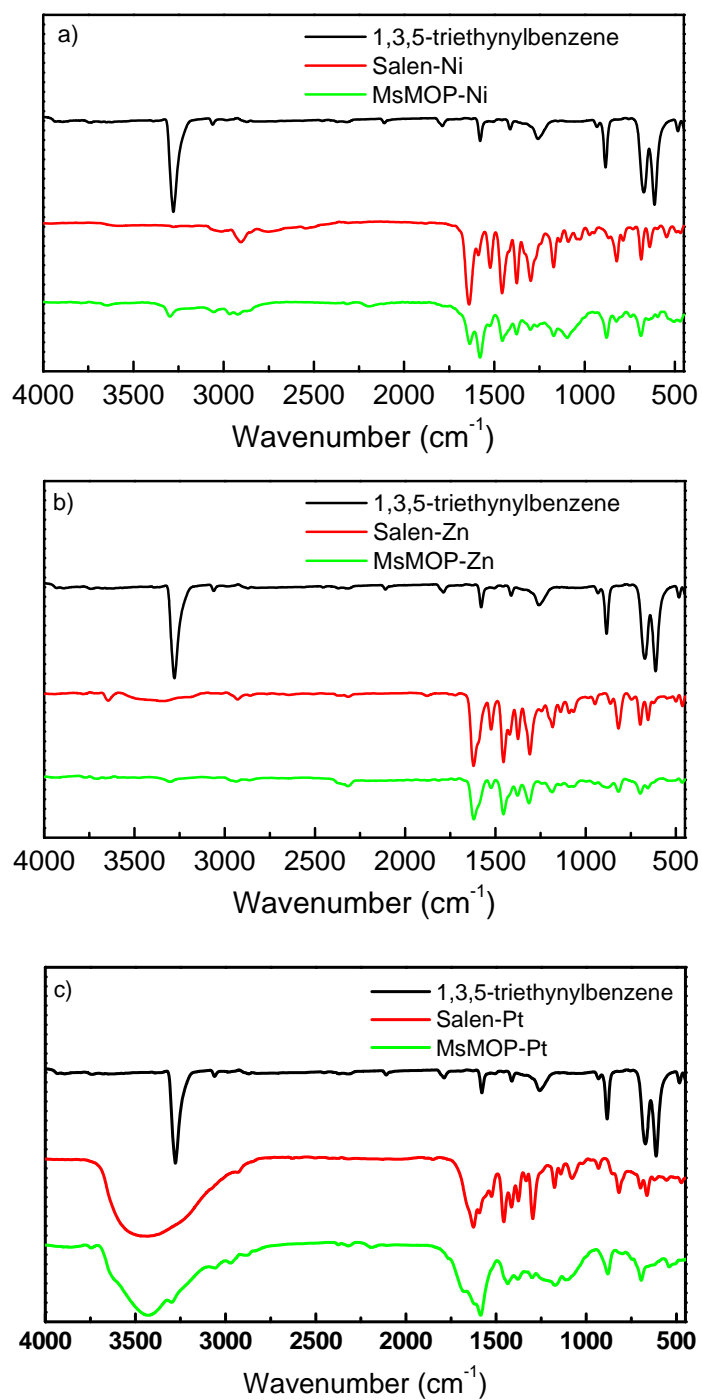

**Fig. S2** The FT-IR spectra of MsMOPs and monomers.

## Section D. The UV Spectra

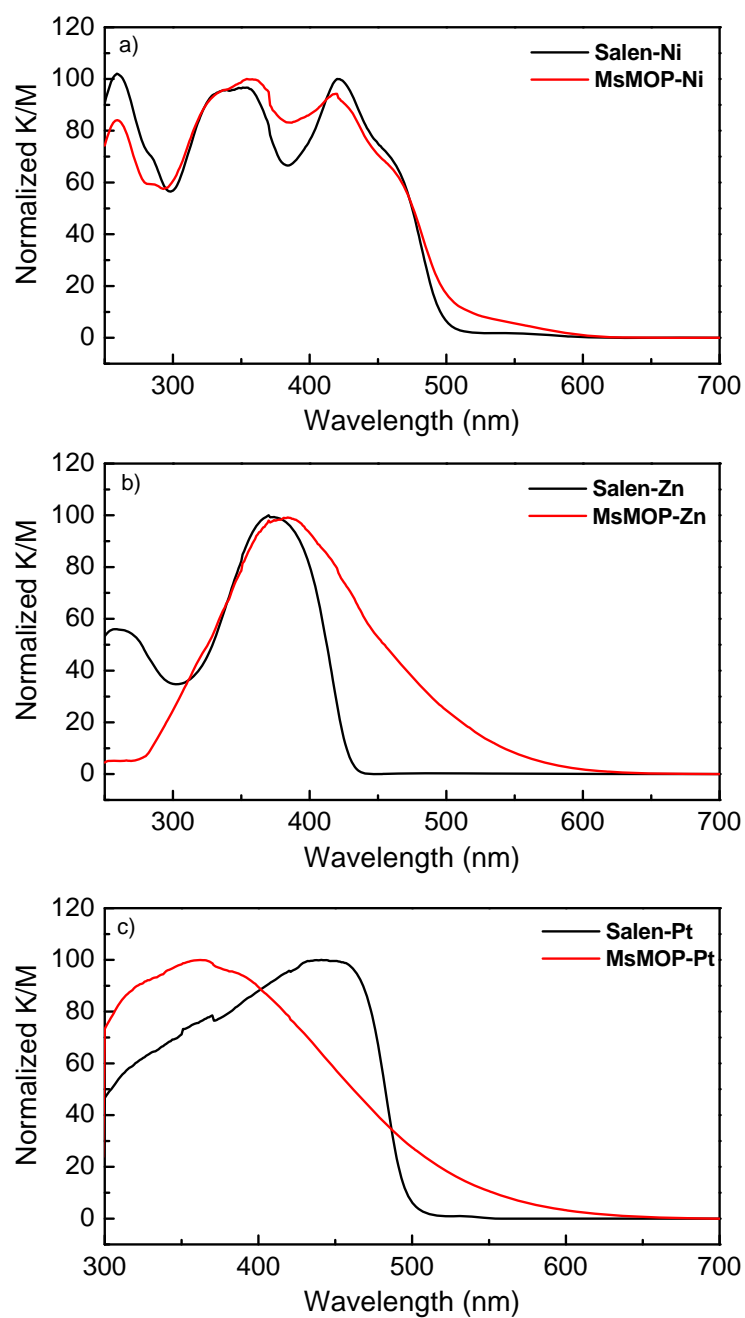

**Fig. S3** UV-Vis spectra of MsMOPs and the corresponding metallosalen monomers.

## Section E. The $^{13}\text{C}$ CP/MAS NMR Spectra

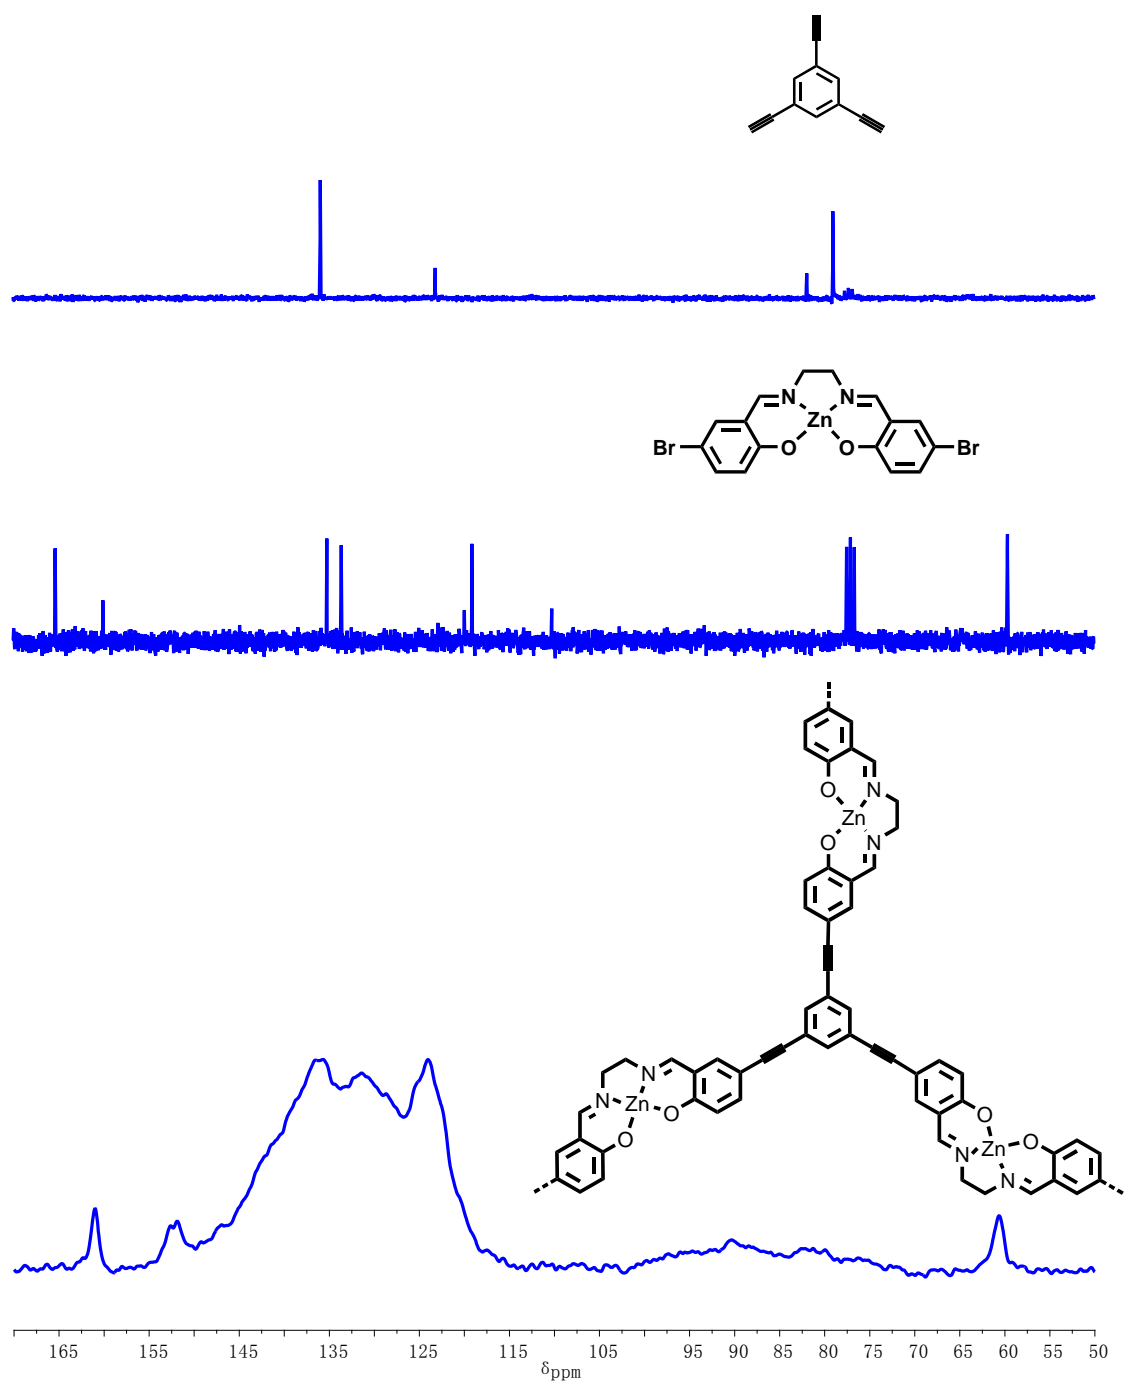

**Fig. S4**  $^{13}\text{C}$  CP/MAS NMR spectroscopy of MsMOP-Zn and  $^{13}\text{C}$  NMR spectra of Salen-Zn and 1,3,5-triethynylbenzene.

## Section F. The Crystalline of MsMOPs

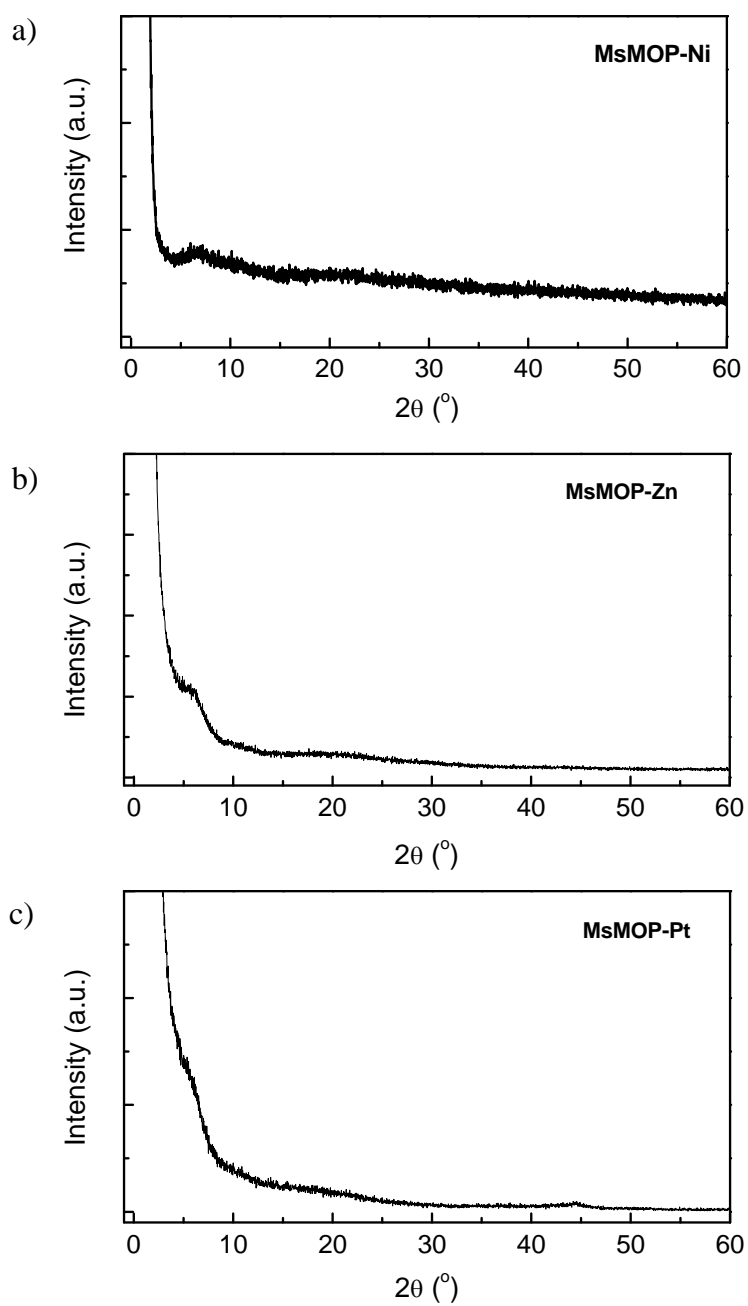

**Fig. S5** PXR curves of MsMOPs.



## Section G. XPS Spectra of MsMOPs

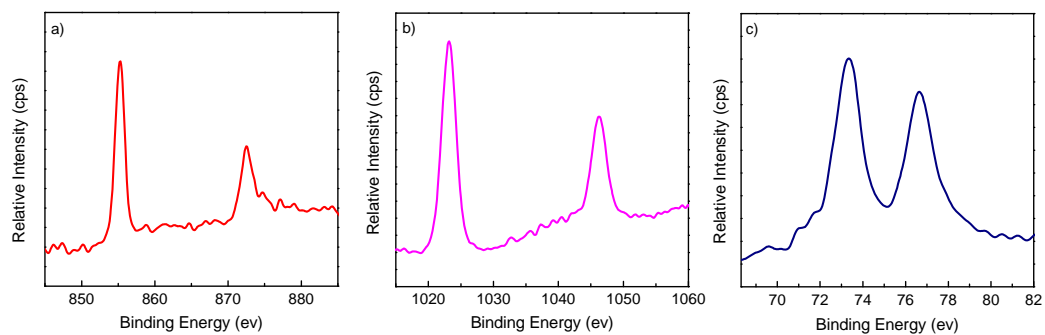

**Fig. S6** XPS spectra taken for the Ni 2p region of MsMOP-Ni (a), the Zn 2p region of MsMOP-Zn (b), and the Pt 4f region of MsMOP-Pt (c).

## Section H. EDS Spectra of MsMOPs

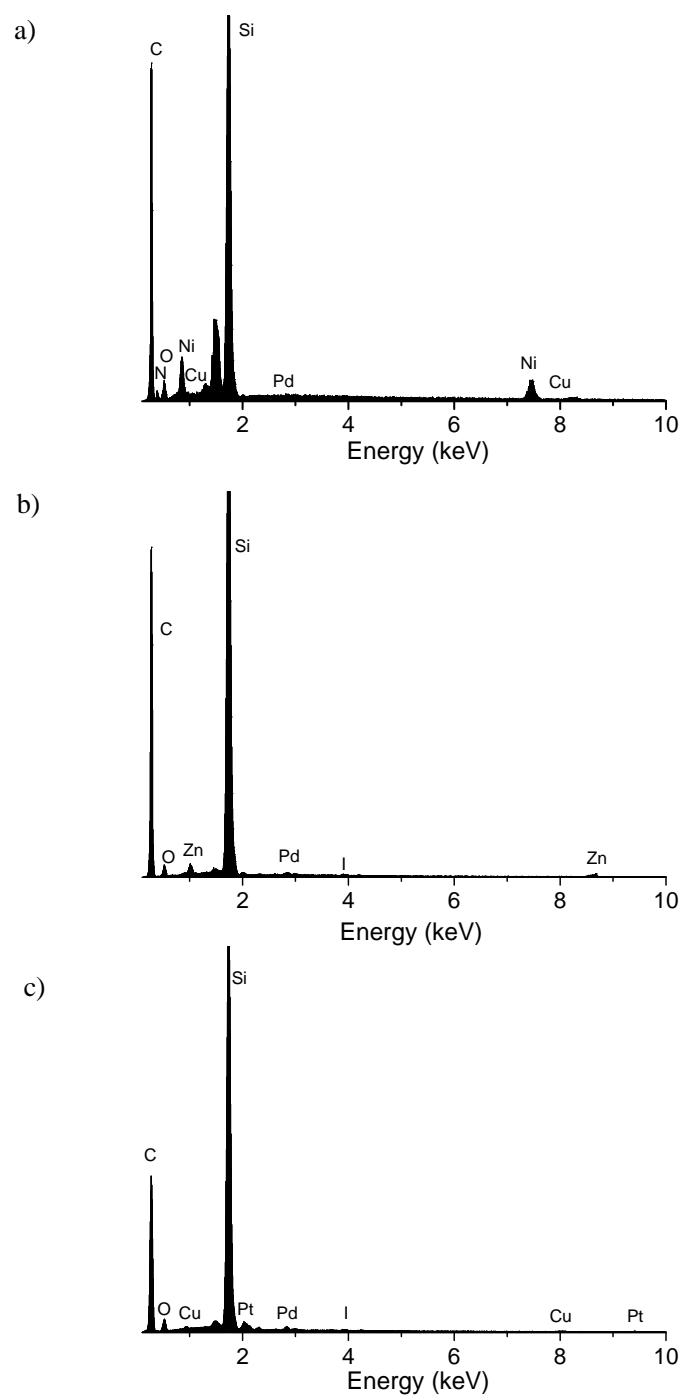

**Fig. S7** EDS spectra of MsMOPs. The low palladium and copper contents are due to the incomplete washing after cross-coupling reaction. The silicon element is from silicon substrate.

## Section I. Gas Uptake and Selectivity of MsMOPs

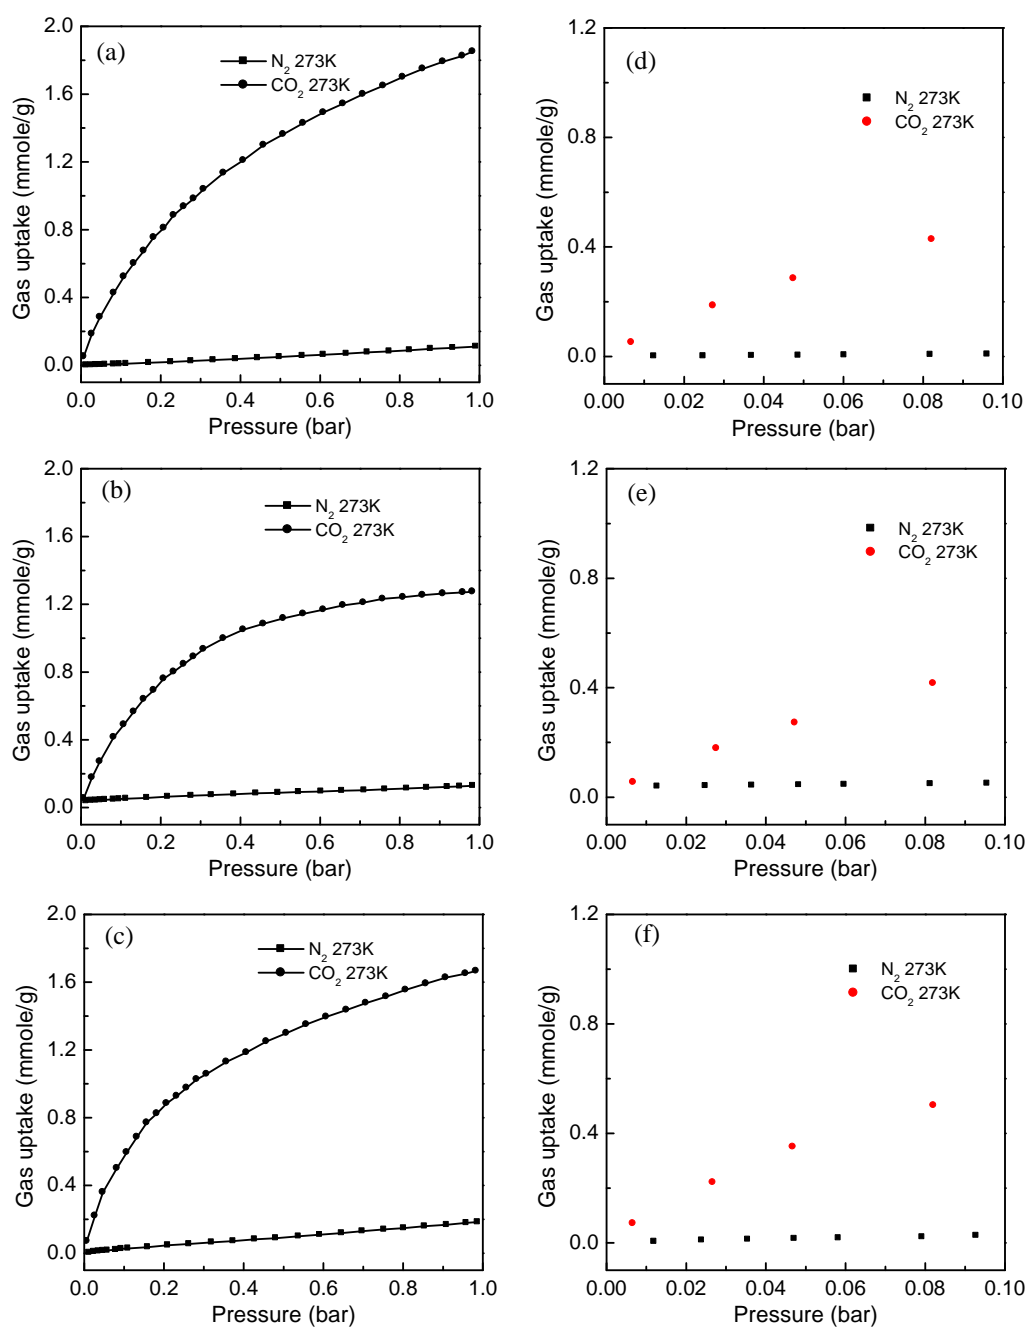

**Fig. S8**  $\text{CO}_2$  and  $\text{N}_2$  adsorption isotherms of MsMOP-Ni (a), MsMOP-Zn (b) and MsMOP-Pt (c) at 273 K and the adsorption data of MsMOP-Ni (d), MsMOP-Zn (e) and MsMOP-Pt (f) at 0~0.1 bar.

## Section J. N<sub>2</sub> Sorption Isotherms of MsMOP-Ni

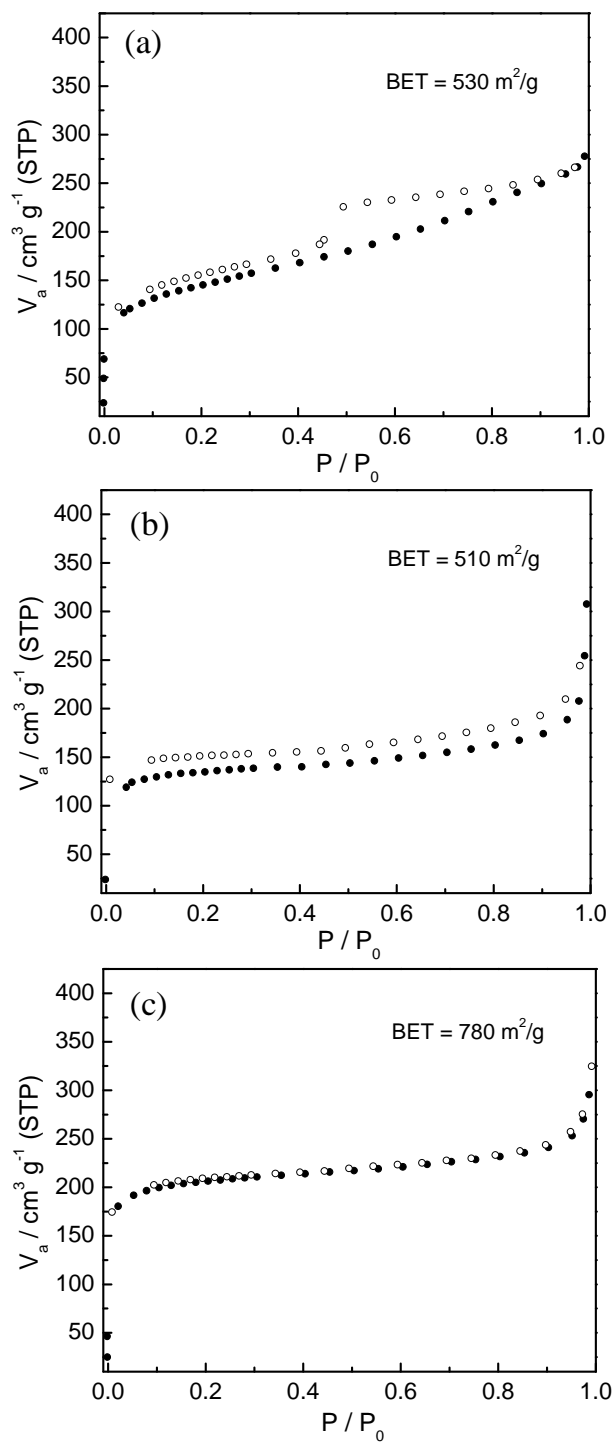

**Fig. S9** Nitrogen adsorption-desorption isotherm and surface areas of MsMOP-Ni in the different solvent systems: toluene/TEA (a), dioxane/TEA (b) and DMF/TEA (c).

## Section K. $^1\text{H-NMR}$ Spectra

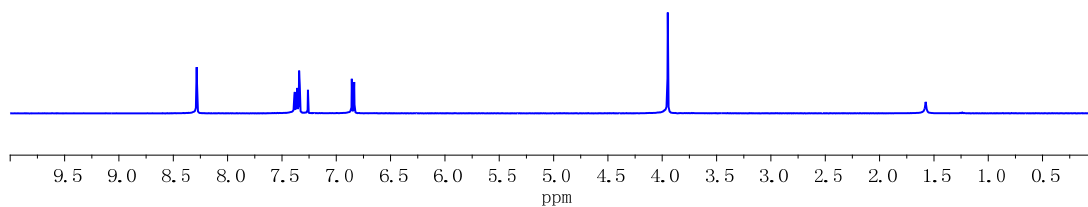

**Fig. S10**  $^1\text{H-NMR}$  spectra of Salen ligand.

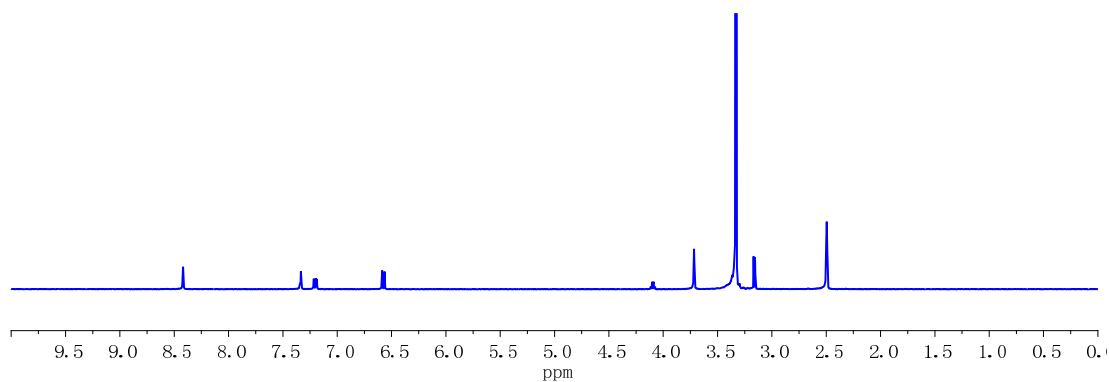

**Fig. S11**  $^1\text{H-NMR}$  spectra of Salen-Zn.

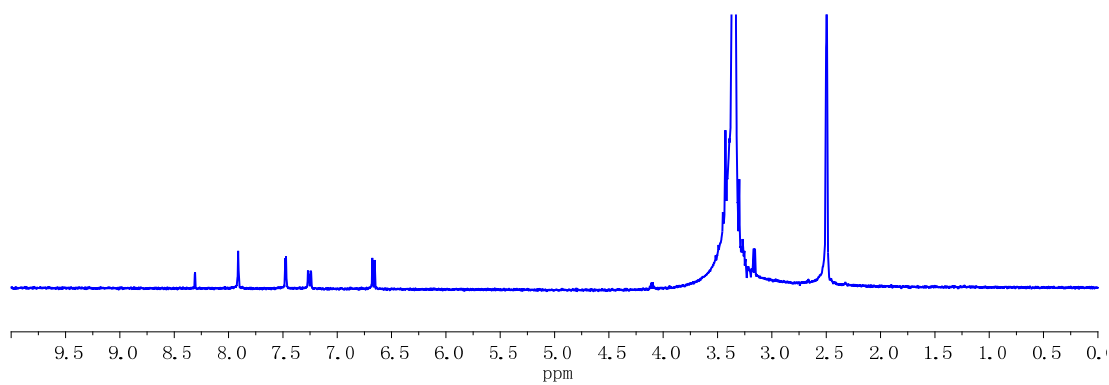

**Fig. S12**  $^1\text{H-NMR}$  spectra of Salen-Ni.

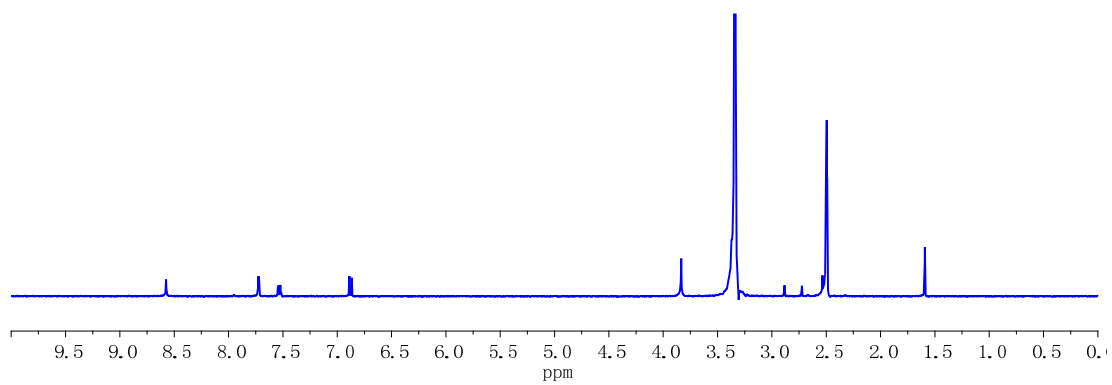

**Fig. S13**  $^1\text{H-NMR}$  spectra of Salen-Pt.
